# Supplementary material for: MIXv2: a long-term mosaic emission inventory for Asia (2010–2017)
Source: Copernicus journal article supplement (doi:10.5194/acp-24-3925-2024), 2024-04-03
Supplement: Supplementary file 1 [file acp-24-3925-2024-supplement.zip]

## Tables and Figures

Table S1. Source profiles used in development of MIXv2

Table S2. Species mapping from SAPRC99 to SAPRC07, used for the Republic of Korea and Hong Kong (China) NMVOC speciation

Table S3. Emissions summary by Asian countries and sectors for all species from 2010-2017 (see attached MIXv2.3\_emission\_summary\_2010-2017.xlsx)

Table S4. Mapping from SAPRC07 species to chemical groups for Fig. 11

Figure S1. Anthropogenic emissions between 2010-2017 of major regions over the globe (China, India, Other East Asia, Other South Asia, Southeast Asia, United States, OECD-Europe). Emissions over Asia are derived from MIXv2, and emissions over the rest of the world are estimated by EDGARv6

Figure S2. Emissions by latitude bands from 2010 to 2017 for NO<sub>x</sub>, NMVOC, CO and PM<sub>2.5</sub>, complemented to Fig. 10

**Table S1. Source profiles used in development of MIXv2<sup>a</sup>.**

| Sector   | Subsector                        | Source                    | Source profiles <sup>b</sup>                 | Activity         | IPCC code |
|----------|----------------------------------|---------------------------|----------------------------------------------|------------------|-----------|
| power    | power                            | raw coal                  | 1178, Shi et al., 2015                       | fuel consumption | 1A1a      |
|          | power                            | cleaned coal              | 1178, Shi et al., 2015                       | fuel consumption | 1A1a      |
|          | power                            | other washed coal         | 1178, Shi et al., 2015                       | fuel consumption | 1A1a      |
|          | power                            | briquettes                | 1178, Shi et al., 2015                       | fuel consumption | 1A1a      |
|          | power                            | diesel oil                | 2                                            | fuel consumption | 1A1a      |
|          | power                            | fuel oil                  | 5647                                         | fuel consumption | 1A1a      |
|          | power                            | LPG                       | 4                                            | fuel consumption | 1A1a      |
|          | power                            | NG                        | 3, 1001                                      | fuel consumption | 1A1a      |
| industry | industrial coal use              | raw coal                  | 1178, 1185, Liu et al.,2008, Shi et al.,2015 | fuel consumption | 1A2, 1A1c |
|          | industrial coal use              | cleaned coal              | 1178, 1185, Liu et al.,2008, Shi et al.,2015 | fuel consumption | 1A2       |
|          | industrial coal use              | other washed coal         | 1178, 1185, Liu et al.,2008, Shi et al.,2015 | fuel consumption | 1A2       |
|          | industrial coal use              | briquettes                | 1178, 1185, Liu et al.,2008, Shi et al.,2015 | fuel consumption | 1A2       |
|          | industrial coal use              | coke                      | 1178, 1185, Liu et al.,2008, Shi et al.,2015 | fuel consumption | 1A2       |
|          | industrial coal use              | cement coal use           | 1185, Liu et al.,2008                        | fuel consumption | 1A2       |
|          | industrial coal use              | lime coal use             | 1185, Liu et al.,2008                        | fuel consumption | 1A2       |
|          | industrial coal use              | brick coal use            | 1185, Liu et al.,2008                        | fuel consumption | 1A2       |
|          | industrial coal use              | synthetic ammonia by coal | 7128, 7129, 7136, 7149                       | fuel consumption | 1A2       |
|          | industrial other fuel combustion | fuel oil                  | 5647                                         | fuel consumption | 1A2       |
|          | industrial other fuel combustion | LPG                       | 4                                            | fuel consumption | 1A2       |
|          | industrial other fuel combustion | NG                        | 3                                            | fuel consumption | 1A2       |
|          | industrial other fuel combustion | coke oven gas             | 5                                            | fuel consumption | 1A2       |
|          | industrial other fuel combustion | other gas                 | 5                                            | fuel consumption | 1A2       |
|          | chemical industry                | flat glass                | 1185, Liu et al.,2008                        | production       | 2B        |
|          | chemical industry                | glass products            | 1185, Liu et al.,2008                        | production       | 2B        |

|  |                                          |                                |                              |                 |      |
|--|------------------------------------------|--------------------------------|------------------------------|-----------------|------|
|  | chemical industry                        | NG production                  | 8949                         | production      | 1B2b |
|  | chemical industry                        | NG distribution                | 8950                         | NG distribution | 1B2b |
|  | chemical industry                        | carbon black                   | 1002                         | production      | 2B   |
|  | chemical industry                        | pulp                           | 8783, 8789, 7101, 7102, 7103 | production      | 2B   |
|  | chemical industry                        | varnish paint production       | 7105, 1094                   | production      | 2B   |
|  | chemical industry                        | architechture paint prodcution | 7105, 1094                   | production      | 2B   |
|  | chemical industry                        | printing ink production        | 72                           | production      | 2B   |
|  | chemical industry                        | glue production                | 2423                         | production      | 2B   |
|  | chemical industry                        | asphalt production             | Liu et al.,2008              | production      | 2B   |
|  | chemical industry                        | rubber                         | 1008                         | production      | 2B   |
|  | chemical industry                        | tyres                          | 272, 273, 274                | production      | 2B   |
|  | chemical industry                        | polystyrene                    | 1004, Hsu et al.,2007        | production      | 2B   |
|  | chemical industry                        | ethylene                       | 2461                         | production      | 2B   |
|  | chemical industry                        | LDPE                           | 2547                         | production      | 2B   |
|  | chemical industry                        | HDPE                           | 2547                         | production      | 2B   |
|  | chemical industry                        | PVC                            | 1091                         | production      | 2B   |
|  | chemical industry                        | poly'prop                      | 68, Mo et al.,2015           | production      | 2B   |
|  | chemical industry                        | synthetic fiber                | 1092                         | production      | 2B   |
|  | chemical industry                        | wool                           | 1095, 1096                   | production      | 2B   |
|  | chemical industry                        | silk                           | 1095, 1096                   | production      | 2B   |
|  | chemical industry                        | cloth                          | 1095, 1096                   | production      | 2B   |
|  | chemical industry                        | spirits                        | 1070, 1071                   | production      | 2    |
|  | oil production distribution and refinery | crude oil production           | 1207, 1212                   | oil production  | 1B2a |
|  | oil production distribution and refinery | crude oil handle               | 296, 1208, 2487              | oil handling    | 1B2a |
|  | oil production distribution and refinery | oil refinery                   | Liu et al.,2008              | crude oil input | 1B2a |

|  |                                          |                                    |                                                       |                       |               |
|--|------------------------------------------|------------------------------------|-------------------------------------------------------|-----------------------|---------------|
|  | oil production distribution and refinery | oil depot-gasoline                 | Liu et al.,2008, Zhang et al.,2013, Wu et al.,2015    | gasoline distribution | 1B2a          |
|  | oil production distribution and refinery | oil depot-diesel                   | Liu et al.,2008                                       | diesel distribution   | 1B2a          |
|  | oil production distribution and refinery | oil station-gasoline               | Zhang et al.,2013                                     | gasoline refueling    | 1B2a          |
|  | oil production distribution and refinery | oil station-diesel                 | Zhang et al.,2013                                     | diesel refueling      | 1B2a          |
|  | other industrial process                 | sintering, iron and steel          | 13, Tsai et al.,2008                                  | production            | 2C1           |
|  | other industrial process                 | non-ferrous metal                  | 1089                                                  | production            | 2C            |
|  | other industrial process                 | cement, lime and brick             | n/a                                                   | production            | 2A1, 2A2, 2A7 |
|  | other industrial process                 | coke                               | Shi et al.,2015                                       | production            | 2             |
|  | other industrial process                 | cake                               | 8538                                                  | production            | 2             |
|  | other industrial process                 | biscuit                            | 8538                                                  | production            | 2             |
|  | other industrial process                 | sugar                              | 8538                                                  | production            | 2             |
|  | other industrial process                 | beer                               | 1070, 1071                                            | production            | 2             |
|  | other industrial process                 | wine                               | 1070, 1071                                            | production            | 2             |
|  | industrial paint use                     | architecture interior wall coating | Wang et al.,2014                                      | solvent used          | 3A            |
|  | industrial paint use                     | architecture other paint           | Liu et al.,2008                                       | solvent used          | 3A            |
|  | industrial paint use                     | new car varnish paint              | Yuan et al.,2010                                      | solvent used          | 3A            |
|  | industrial paint use                     | vehicle refurbish paint            | Wang et al.,2014                                      | solvent used          | 3A            |
|  | industrial paint use                     | decorations wood                   | Yuan et al.,2010                                      | solvent used          | 3A            |
|  | industrial paint use                     | wood furniture                     | Zheng et al.,2013                                     | solvent used          | 3A            |
|  | industrial paint use                     | other industry paint               | 1013                                                  | solvent used          | 3B            |
|  | solvent use other than paint             | printing ink                       | Yuan et al.,2010, Zheng et al.,2013, Wang et al.,2014 | solvent used          | 3C            |
|  | solvent use other than paint             | printing cleaning gasoline solvent | Liu et al.,2008                                       | solvent used          | 3B            |
|  | solvent use other than paint             | passenger vehicle treated-dewax    | 1194                                                  | vehicle ownership     | 3C            |

|                |                                   |                                  |                                                                                                                    |                   |       |
|----------------|-----------------------------------|----------------------------------|--------------------------------------------------------------------------------------------------------------------|-------------------|-------|
|                | solvent use other than paint      | passenger vehicle treated-reseal | 1194                                                                                                               | vehicle ownership | 3C    |
|                | solvent use other than paint      | wood production treatment        | 2404                                                                                                               | solvent used      | 3C    |
|                | solvent use other than paint      | pharmaceutical production        | 3040, 3144                                                                                                         | solvent used      | 3C    |
|                | solvent use other than paint      | pesticide use                    | 76, 3001                                                                                                           | solvent used      | 3C    |
| residential    | residential coal combustion       | raw coal                         | 1185, Tsai et al.,2003, Liu et al.,2008, Mo et al.,2016                                                            | fuel consumption  | 1A4b  |
|                | residential coal combustion       | other washed coal                | 1185, Tsai et al.,2003, Liu et al.,2008, Mo et al.,2016                                                            | fuel consumption  | 1A4b  |
|                | residential coal combustion       | briquettes                       | 1185, Tsai et al.,2003, Liu et al.,2008, Mo et al.,2016                                                            | fuel consumption  | 1A4b  |
|                | residential biofuel combustion    | wood                             | Tsai et al.,2003, Liu et al.,2008, Wang et al.,2009                                                                | fuel consumption  | 1A4bx |
|                | residential biofuel combustion    | crop residual                    | Tsai et al.,2003, Wang et al.,2009, Mo et al.,2016                                                                 | fuel consumption  | 1A4bx |
|                | residential other fuel combustion | LPG                              | Tsai et al., ,2003                                                                                                 | fuel consumption  | 1A4b  |
|                | residential other fuel combustion | NG                               | Tsai et al., ,2003                                                                                                 | fuel consumption  | 1A4b  |
|                | waste treatment                   | fill                             | 202, 3002                                                                                                          | amount of waste   | 6A    |
|                | waste treatment                   | incineration                     | 122                                                                                                                | amount of waste   | 6C    |
|                | domestic solvent use              | domestic solvent                 | 197                                                                                                                | population        | 3C    |
|                | domestic solvent use              | dry clean C2Cl4 usage            | 1193, 85                                                                                                           | solvent used      | 3C    |
|                | domestic solvent use              | glue use                         | 1020, 1088, 2423, 3004, 3005, 3006, 3007, 3008, 3009, 3010, 3011, 3012, 3013, 3142, 8523, 8524, 8525               | solvent used      | 3C    |
| transportation | onroad gasoline                   | heavy duty truck                 | 1186, Schauer et al.,2002                                                                                          | gasoline fuel     | 1A3b  |
|                | onroad gasoline                   | medium duty truck                | 1186, Schauer et al.,2002                                                                                          | gasoline fuel     | 1A3b  |
|                | onroad gasoline                   | light duty truck                 | 4557, 1203, 8756, 6001, Duffy et al.,1999, Schauer et al.,2002, Liu et al.,2008, Wang et al.,2013, Dai et al.,2013 | gasoline fuel     | 1A3b  |
|                | onroad gasoline                   | mini truck                       | 4557, 1203, 8756, 6001, Duffy et al.,1999, Schauer et al.,2002, Liu et al.,2008, Wang et al.,2013, Dai et al.,2013 | gasoline fuel     | 1A3b  |
|                | onroad gasoline                   | heavy duty bus                   | 1186, Schauer et al.,2002                                                                                          | gasoline fuel     | 1A3b  |
|                | onroad gasoline                   | medium duty bus                  | 1186, Schauer et al.,2002                                                                                          | gasoline fuel     | 1A3b  |
|                | onroad gasoline                   | light duty bus                   | 4557, 1203, 8756, 6001, Duffy et al.,1999, Schauer et al.,2002, Liu                                                | gasoline fuel     | 1A3b  |

|                      |                              |                        |                                                                                                                    |                        |      |
|----------------------|------------------------------|------------------------|--------------------------------------------------------------------------------------------------------------------|------------------------|------|
|                      |                              |                        | et al.,2008, Wang et al.,2013, Dai et al.,2013                                                                     |                        |      |
|                      | onroad gasoline              | mini bus               | 4557, 1203, 8756, 6001, Duffy et al.,1999, Schauer et al.,2002, Liu et al.,2008, Wang et al.,2013, Dai et al.,2013 | gasoline fuel          | 1A3b |
|                      | onroad gasoline              | motorcycle             | Liu et al.,2008, Yao et al.,2013                                                                                   | gasoline fuel          | 1A3b |
|                      | onroad gasoline              | evaporatation          | Liu et al.,2008                                                                                                    | gasoline fuel          | 1A3b |
|                      | onroad diesel                | heavy duty truck       | 4674, 8775, Schauer et al.,1999, Mo et al.,2016                                                                    | diesel fuel            | 1A3b |
|                      | onroad diesel                | medium duty truck      | 4674, 8775, Schauer et al.,1999, Mo et al.,2016                                                                    | diesel fuel            | 1A3b |
|                      | onroad diesel                | light duty truck       | 1201, Liu et al.,2008, Tsai et al.,2012                                                                            | diesel fuel            | 1A3b |
|                      | onroad diesel                | mini truck             | 1201, Liu et al.,2008, Tsai et al.,2012                                                                            | diesel fuel            | 1A3b |
|                      | onroad diesel                | heavy duty bus         | 4674, 8775, Schauer et al.,1999, Mo et al.,2016                                                                    | diesel fuel            | 1A3b |
|                      | onroad diesel                | medium duty bus        | 4674, 8775, Schauer et al.,1999, Mo et al.,2016                                                                    | diesel fuel            | 1A3b |
|                      | onroad diesel                | light duty bus         | 1201, Liu et al.,2008, Tsai et al.,2012                                                                            | diesel fuel            | 1A3b |
|                      | offroad diesel               | locomotive             | 95331, 95332, 95333                                                                                                | diesel fuel            | 1A3c |
|                      | offroad diesel               | in-land waterway       | 5677, 5678                                                                                                         | diesel fuel            | 1A4c |
|                      | offroad diesel               | 3-wheelers             | Yao et al.,2015                                                                                                    | diesel fuel            | 1A4c |
|                      | offroad diesel               | low-speed truck        | Yao et al.,2015                                                                                                    | diesel fuel            | 1A4c |
|                      | offroad diesel               | agricultural machinery | 95331, 95332, 95333                                                                                                | diesel fuel            | 1A4c |
|                      | offroad diesel               | construction machinery | 95331, 95332, 95333                                                                                                | diesel fuel            | 1A4c |
| agriculture          | livestock                    | livestock              | n/a                                                                                                                | animal population      | 4D   |
|                      | fertilizer use               | synthetic fertilizer   | n/a                                                                                                                | fertilizer consumption | 4B   |
| open biomass burning | agriculture in-field burning | crop residue           | Akagi et al., 2011                                                                                                 | biomass burned         | 4F   |
|                      | fires                        | peat                   | Akagi et al., 2011                                                                                                 | biomass burned         | 5D   |
|                      | fires                        | tropical forest        | Akagi et al., 2011                                                                                                 | biomass burned         | 4E   |
|                      | fires                        | savanna                | Akagi et al., 2011                                                                                                 | biomass burned         | 4E   |
|                      | fires                        | extratropical forest   | Akagi et al., 2011                                                                                                 | biomass burned         | 5A   |
|                      | fires                        | boreal forest          | Akagi et al., 2011                                                                                                 | biomass burned         | 5A   |
|                      | fires                        | grassland              | Akagi et al., 2011                                                                                                 | biomass burned         | 5C   |
| shipping             | domestic shipping            | inland shipping        | Xiao et al., 2018                                                                                                  | fuel consumption       | 1A3d |
|                      | international shipping       | international shipping | Xiao et al., 2018                                                                                                  | fuel consumption       | 1C2  |

Note:

<sup>a</sup> Derived from Li et al. (2019) with updates on open biomass burning and shipping.

<sup>a</sup> The numbers represent “P\_NUMBER” of profiles in the SPECIATE v4.5 database.

**Table S2. Species mapping from SAPRC99 to SAPRC07, used for the Republic of Korea and Hong Kong (China) NMVOC speciation.**

| SAPRC07 species | mapping formula from SAPRC99                                        |
|-----------------|---------------------------------------------------------------------|
| SAPRC07_CH4     | SAPRC99_CH4                                                         |
| SAPRC07_ALK1    | SAPRC99_ALK1                                                        |
| SAPRC07_ALK2    | SAPRC99_ALK2-SAPRC07_ACYE-SAPRC07_FACD-AACD-PACD                    |
| SAPRC07_ALK3    | SAPRC99_ALK3                                                        |
| SAPRC07_ALK4    | SAPRC99_ALK4                                                        |
| SAPRC07_ALK5    | SAPRC99_ALK5                                                        |
| SAPRC07_ETHE    | SAPRC99_ETHE                                                        |
| SAPRC07_OLE1    | SAPRC99_OLE1                                                        |
| SAPRC07_OLE2    | SAPRC99_OLE2                                                        |
| SAPRC07_ISOP    | SAPRC99_ISOP                                                        |
| SAPRC07_TERP    | SAPRC99_TERP                                                        |
| SAPRC07_BENZ    | Based on the ratio of SAPRC07_BENZ/SAPRC99_ARO1 from MEIC by sector |
| SAPRC07_ARO1    | $SAPRC99\_ARO1 - 0.295 * SAPRC07\_BENZ$                             |
| SAPRC07_ARO2    | SAPRC99_ARO2                                                        |
| SAPRC07_ACYE    | Based on the ratio of SAPRC07_ACYE/SAPRC09_ALK2 from MEIC by sector |
| SAPRC07_HCHO    | SAPRC99_HCHO                                                        |
| SAPRC07_CCHO    | SAPRC99_CCHO                                                        |
| SAPRC07_RCHO    | SAPRC99_RCHO                                                        |
| SAPRC07_BALD    | SAPRC99_BALD                                                        |
| SAPRC07_ACET    | SAPRC99_ACET                                                        |
| SAPRC07_MEK     | SAPRC99_MEK                                                         |
| SAPRC07_PRD2    | SAPRC99_PRD2                                                        |
| SAPRC07_MEOH    | SAPRC99_MEOH                                                        |
| SAPRC07_FACD    | Based on the ratio of FACD/HCHO from MEIC by sector                 |
| SAPRC07_AACD    | Based on the ratio of AACD/HCHO from MEIC by sector                 |
| SAPRC07_PACD    | Based on the ratio of PACD/HCHO from MEIC by sector                 |
| SAPRC07_GLY     | SAPRC99_GLY                                                         |
| SAPRC07_MGLY    | SAPRC99_MGLY                                                        |
| SAPRC07_BACL    | SAPRC99_BACL                                                        |
| SAPRC07_CRES    | $SAPRC99\_CRES + SAPRC99\_PHEN$                                     |
| SAPRC07_MACR    | SAPRC99_MACR                                                        |
| SAPRC07_MVK     | SAPRC99_MVK                                                         |
| SAPRC07_IPRD    | SAPRC99_IPRD                                                        |
| SAPRC07_RNO3    | Based on the ratio of SAPRC07_RNO3/SAPRC07_NVOL from MEIC by sector |
| SAPRC07_NVOL    | SAPRC99_NVOL                                                        |
| SAPRC07_NROG    | $SAPRC99\_NROG - 0.705 * SAPRC07\_BENZ$                             |



**Table S4. Mapping from SAPRC07 species to chemical groups for Fig. 11.**

| Species      | Groups    |
|--------------|-----------|
| SAPRC07_CH4  | n/a       |
| SAPRC07_ALK1 | alkanes   |
| SAPRC07_ALK2 | alkanes   |
| SAPRC07_ALK3 | alkanes   |
| SAPRC07_ALK4 | alkanes   |
| SAPRC07_ALK5 | alkanes   |
| SAPRC07_ETHE | alkenes   |
| SAPRC07_OLE1 | alkenes   |
| SAPRC07_OLE2 | alkenes   |
| SAPRC07_ISOP | alkenes   |
| SAPRC07_TERP | alkenes   |
| SAPRC07_BENZ | aromatics |
| SAPRC07_ARO1 | aromatics |
| SAPRC07_ARO2 | aromatics |
| SAPRC07_ACYE | alkynes   |
| SAPRC07_HCHO | aldehydes |
| SAPRC07_CCHO | aldehydes |
| SAPRC07_RCHO | aldehydes |
| SAPRC07_BALD | aldehydes |
| SAPRC07_ACET | ketones   |
| SAPRC07_MEK  | ketones   |
| SAPRC07_PRD2 | ketones   |
| SAPRC07_MEOH | ovocs     |
| SAPRC07_FACD | ovocs     |
| SAPRC07_AACD | ovocs     |
| SAPRC07_PACD | ovocs     |
| SAPRC07_GLY  | aldehydes |
| SAPRC07_MGLY | aldehydes |
| SAPRC07_BACL | ketones   |
| SAPRC07_CRES | ovocs     |
| SAPRC07_MACR | aldehydes |
| SAPRC07_MVK  | aldehydes |
| SAPRC07_IPRD | aldehydes |
| SAPRC07_RNO3 | others    |
| SAPRC07_NVOL | others    |
| SAPRC07_NROG | others    |

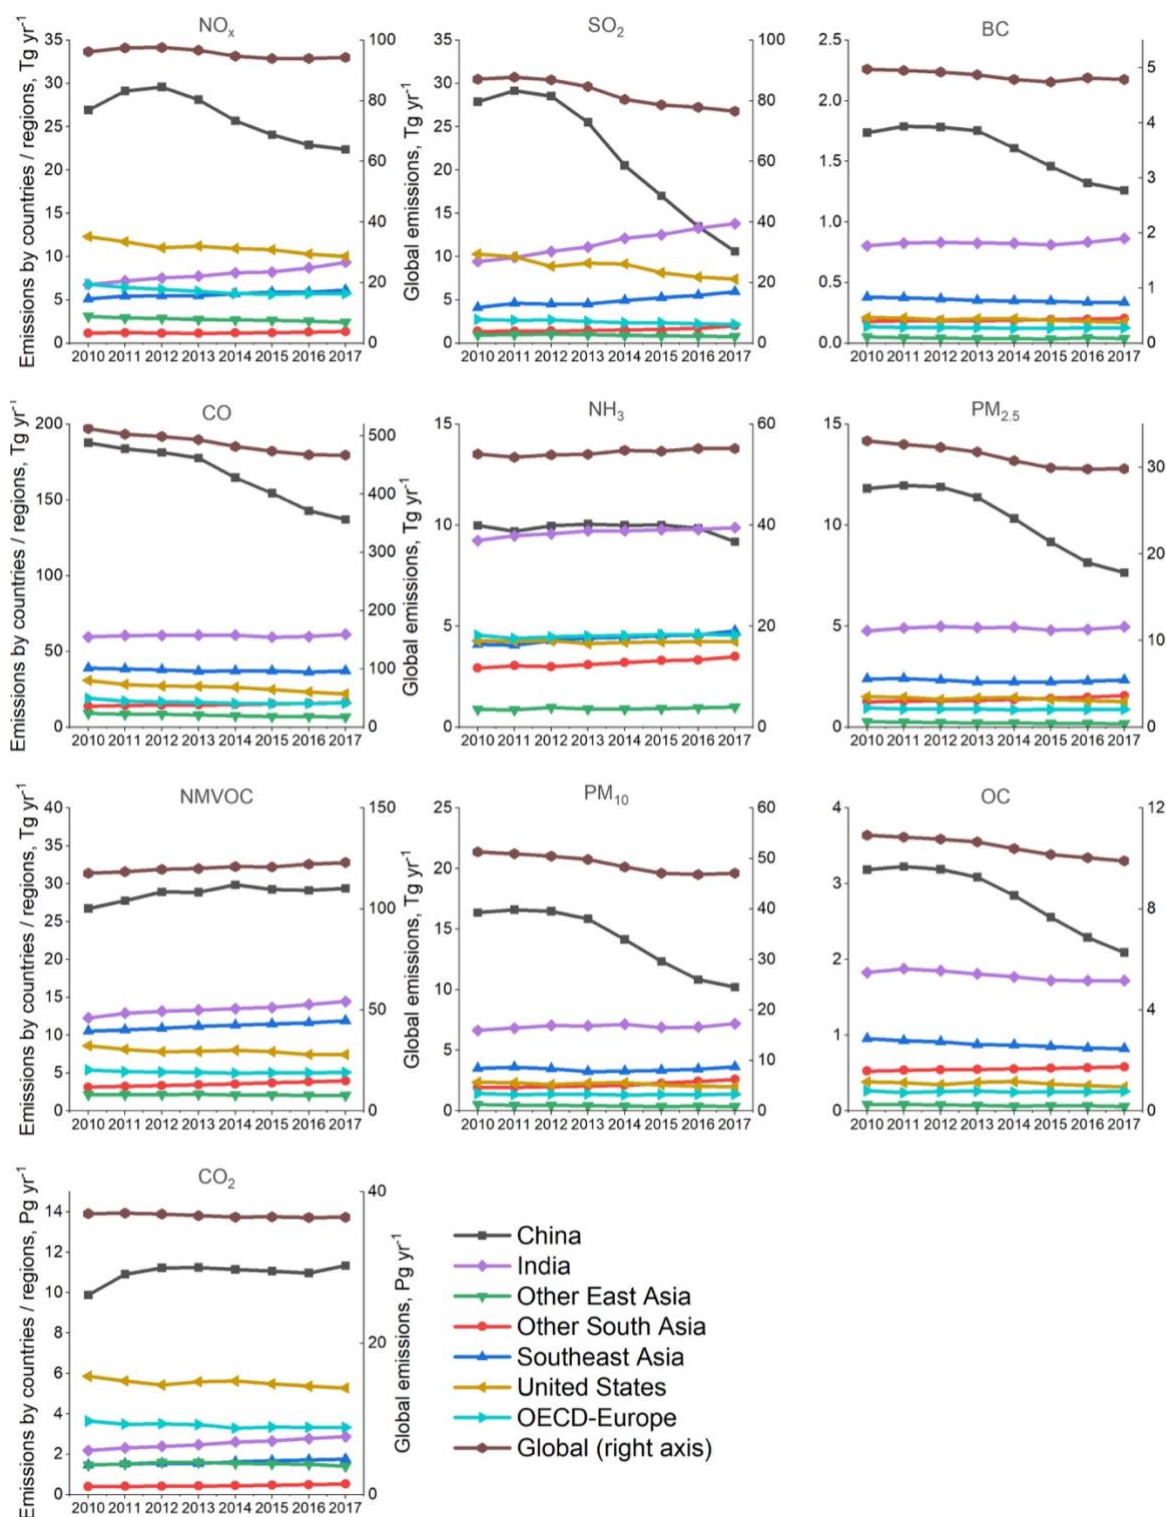

**Figure S1. Anthropogenic emissions between 2010-2017 of major regions over the globe (China, India, Other East Asia, Other South Asia, Southeast Asia, United States, OECD-Europe). Emissions over Asia are derived from MIXv2, and emissions over the rest of the world are estimated by EDGARv6.**

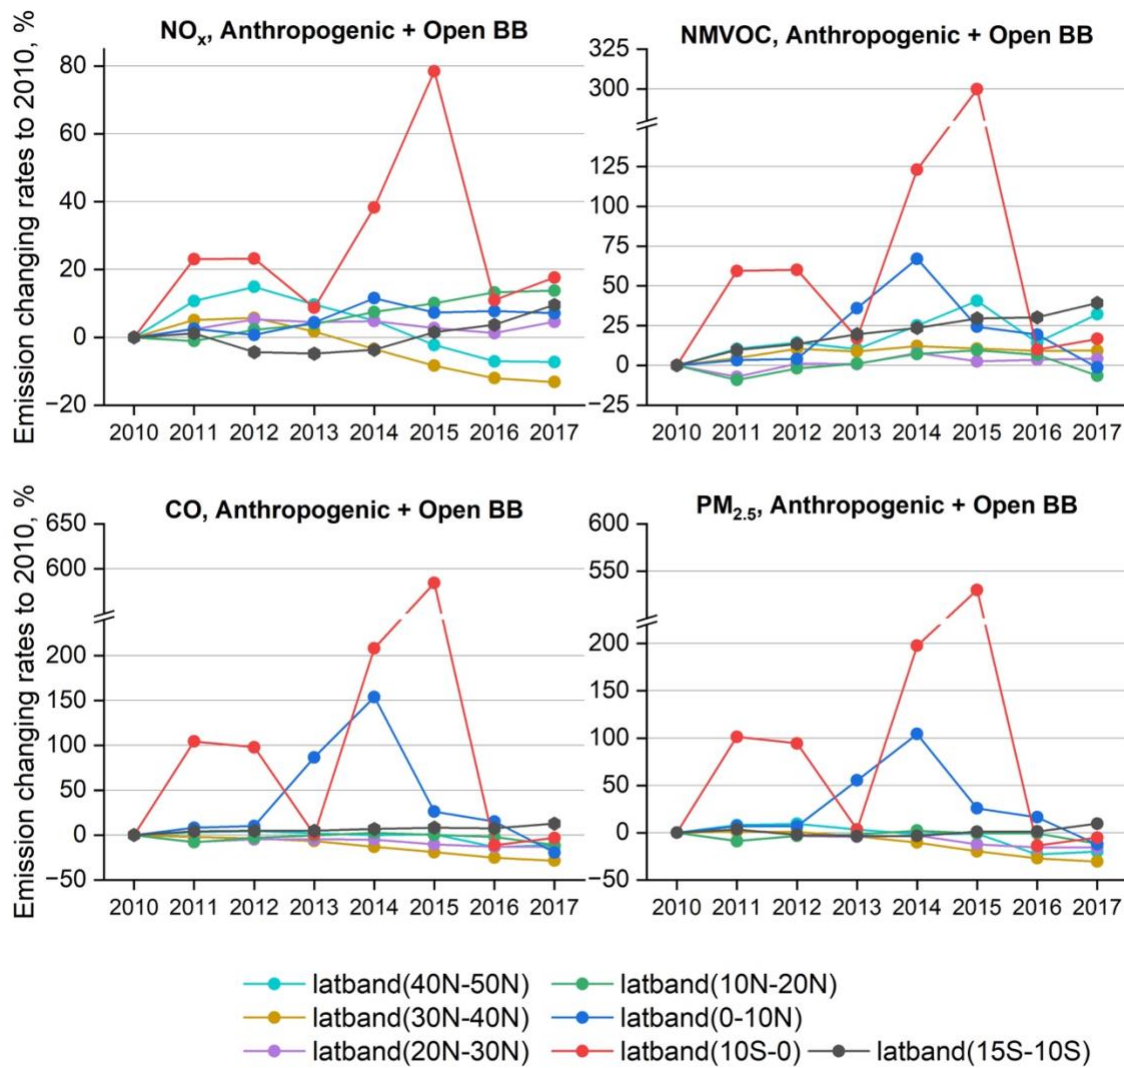

**Figure S2. Emissions by latitude bands from 2010 to 2017 for  $\text{NO}_x$ , NMVOC, CO and  $\text{PM}_{2.5}$ , complemented to Fig. 10.**

## Reference

- Akagi, S. K., Yokelson, R. J., Wiedinmyer, C., Alvarado, M. J., Reid, J. S., Karl, T., Crounse, J. D., and Wennberg, P. O.: Emission factors for open and domestic biomass burning for use in atmospheric models, *Atmos. Chem. Phys.*, 11, 4039-4072, 2011.
- Dai, P., Ge, Y., Lin, Y., Su, S., and Liang, B.: Investigation on characteristics of exhaust and evaporative emissions from passenger cars fueled with gasoline/methanol blends, *Fuel*, 113, 10-16, <https://doi.org/10.1016/j.fuel.2013.05.038>, 2013.
- Duffy, B. L., Nelson, P. F., Ye, Y., and Weeks, I. A.: Speciated hydrocarbon profiles and calculated reactivities of exhaust and evaporative emissions from 82 in-use light-duty Australian vehicles, *Atmospheric Environment*, 33, 291-307, [https://doi.org/10.1016/S1352-2310\(98\)00163-0](https://doi.org/10.1016/S1352-2310(98)00163-0), 1999.
- He, Q.: Characteristics, emission factors and emission estimation for particulate matters and volatile organic compounds emitted from coke production in China (in Chinese), Ph.D thesis, Guangzhou Institute of Geochemistry, Chinese Academy of Sciences, Guangzhou, 2006.
- Hsu, Y.-C., Chen, S.-K., Tsai, J.-H., and Chiang, H.-L.: Determination of Volatile Organic Profiles and Photochemical Potentials from Chemical Manufacture Process Vents, *Journal of the Air & Waste Management Association*, 57, 698-704, 10.3155/1047-3289.57.6.698, 2007.
- Li, M., Zhang, Q., Zheng, B., Tong, D., Lei, Y., Liu, F., Hong, C., Kang, S., Yan, L., Zhang, Y., Bo, Y., Su, H., Cheng, Y., and He, K.: Persistent growth of anthropogenic non-methane volatile organic compound (NMVOC) emissions in China during 1990–2017: drivers, speciation and ozone formation potential, *Atmos. Chem. Phys.*, 19, 8897-8913, 2019.
- Liu, Y., Shao, M., Fu, L., Lu, S., Zeng, L., and Tang, D.: Source profiles of volatile organic compounds (VOCs) measured in China: Part I, *Atmospheric Environment*, 42, 6247-6260, <https://doi.org/10.1016/j.atmosenv.2008.01.070>, 2008.
- Mo, Z., Shao, M., and Lu, S.: Compilation of a source profile database for hydrocarbon and OVOC emissions in China, *Atmospheric Environment*, 143, 209-217, <http://dx.doi.org/10.1016/j.atmosenv.2016.08.025>, 2016.
- Mo, Z., Shao, M., Lu, S., Qu, H., Zhou, M., Sun, J., and Gou, B.: Process-specific emission characteristics of volatile organic compounds (VOCs) from petrochemical facilities in the Yangtze River Delta, China, *Science of The Total Environment*, 533, 422-431, <https://doi.org/10.1016/j.scitotenv.2015.06.089>, 2015.
- Schauer, J. J., Kleeman, M. J., Cass, G. R., and Simoneit, B. R. T.: Measurement of Emissions from Air Pollution Sources. 2. C1 through C30 Organic Compounds from Medium Duty Diesel Trucks, *Environmental Science & Technology*, 33, 1578-1587, 10.1021/es980081n, 1999.
- Schauer, J. J., Kleeman, M. J., Cass, G. R., and Simoneit, B. R. T.: Measurement of Emissions from Air Pollution Sources. 5. C1–C32 Organic Compounds from Gasoline-Powered Motor Vehicles, *Environmental Science & Technology*, 36, 1169-1180, 10.1021/es0108077, 2002.
- Shi, J., Deng, H., Bai, Z., Kong, S., Wang, X., Hao, J., Han, X., and Ning, P.: Emission and profile characteristic of volatile organic compounds emitted from coke production, iron smelt, heating station and power plant in Liaoning Province, China, *Science of The Total Environment*, 515-516, 101-108, <https://doi.org/10.1016/j.scitotenv.2015.02.034>, 2015.
- Tsai, J.-H., Chang, S.-Y., and Chiang, H.-L.: Volatile organic compounds from the exhaust of light-duty diesel vehicles, *Atmospheric Environment*, 61, 499-506, <https://doi.org/10.1016/j.atmosenv.2012.07.078>, 2012.
- Tsai, J.-H., Lin, K.-H., Chen, C.-Y., Lai, N., Ma, S.-Y., and Chiang, H.-L.: Volatile organic compound constituents from an integrated iron and steel facility, *Journal of Hazardous Materials*, 157, 569-578, <https://doi.org/10.1016/j.jhazmat.2008.01.022>, 2008.
- Tsai, S. M., Zhang, J., Smith, K. R., Ma, Y., Rasmussen, R. A., and Khalil, M. A. K.: Characterization of Non-methane Hydrocarbons Emitted from Various Cookstoves Used in China, *Environmental Science & Technology*, 37, 2869-2877, 10.1021/es026232a, 2003.

- Wang, H., Qiao, Y., Chen, C., Lu, J., Dai, H., Qiao, L., Lou, S., Huang, C., Li, L., Jing, S., and Wu, J.: Source Profiles and Chemical Reactivity of Volatile Organic Compounds from Solvent Use in Shanghai, China, *Aerosol and Air Quality Research*, 14, 301-310, [10.4209/aaqr.2013.03.0064](https://doi.org/10.4209/aaqr.2013.03.0064), 2014.
- Wang, J., Jin, L., Gao, J., Shi, J., Zhao, Y., Liu, S., Jin, T., Bai, Z., and Wu, C.-Y.: Investigation of speciated VOC in gasoline vehicular exhaust under ECE and EUDC test cycles, *Science of The Total Environment*, 445-446, 110-116, <https://doi.org/10.1016/j.scitotenv.2012.12.044>, 2013.
- Wang, S., Wei, W., Du, L., Li, G., and Hao, J.: Characteristics of gaseous pollutants from biofuel-stoves in rural China, *Atmospheric Environment*, 43, 4148-4154, <http://dx.doi.org/10.1016/j.atmosenv.2009.05.040>, 2009.
- Wei, W., Wang, S., and Hao, J.: Estimation and forecast of volatile organic compounds emitted from paint uses in China, *Environmental Science*, 30, 2809-2815, 2009.
- Wu, Y., Yang, Y.-D., Shao, M., and Lu, S.-H.: Missing in total OH reactivity of VOCs from gasoline evaporation, *Chinese Chemical Letters*, 26, 1246-1248, <https://doi.org/10.1016/j.cclet.2015.05.047>, 2015.
- Xiao, Q., Li, M., Liu, H., Fu, M., Deng, F., Lv, Z., Man, H., Jin, X., Liu, S., and He, K.: Characteristics of marine shipping emissions at berth: profiles for particulate matter and volatile organic compounds, *Atmos. Chem. Phys.*, 18, 9527-9545, 2018.
- Yao, Y.-C., Tsai, J.-H., and Wang, I. T.: Emissions of gaseous pollutant from motorcycle powered by ethanol–gasoline blend, *Applied Energy*, 102, 93-100, <https://doi.org/10.1016/j.apenergy.2012.07.041>, 2013.
- Yao, Z., Wu, B., Shen, X., Cao, X., Jiang, X., Ye, Y., and He, K.: On-road emission characteristics of VOCs from rural vehicles and their ozone formation potential in Beijing, China, *Atmospheric Environment*, 105, 91-96, <https://doi.org/10.1016/j.atmosenv.2015.01.054>, 2015.
- Yuan, B., Shao, M., Lu, S., and Wang, B.: Source profiles of volatile organic compounds associated with solvent use in Beijing, China, *Atmospheric Environment*, 44, 1919-1926, <http://dx.doi.org/10.1016/j.atmosenv.2010.02.014>, 2010.
- Zhang, Y., Wang, X., Zhang, Z., Lü, S., Shao, M., Lee, F. S. C., and Yu, J.: Species profiles and normalized reactivity of volatile organic compounds from gasoline evaporation in China, *Atmospheric Environment*, 79, 110-118, <http://dx.doi.org/10.1016/j.atmosenv.2013.06.029>, 2013.
- Zheng, J., Yu, Y., Mo, Z., Zhang, Z., Wang, X., Yin, S., Peng, K., Yang, Y., Feng, X., and Cai, H.: Industrial sector-based volatile organic compound (VOC) source profiles measured in manufacturing facilities in the Pearl River Delta, China, *Science of The Total Environment*, 456-457, 127-136, <https://doi.org/10.1016/j.scitotenv.2013.03.055>, 2013.
