# Supplementary material for: MIXv2: a long-term mosaic emission inventory for Asia (2010–2017)
Source: Copernicus journal article supplement (doi:10.5194/acp-24-3925-2024), 2024-04-03
Supplement: Supplementary file 3 [file acp-24-3925-2024-supplement.zip]

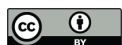

## *Supplement of*

## **MIXv2: a long-term mosaic emission inventory for Asia (2010–2017)**

**Meng Li et al.**

*Correspondence to:* Meng Li (meng.li-1@colorado.edu)

- acp-24-3925-2024-supplement-title-page.pdf
- MIXv2.3\_emission\_summary\_2010-2017.xlsx
- Manuscript\_MIXv2\_EI\_MLi\_acp\_SI.pdf
- \_\_MACOSX
  - .\_MIXv2.3\_emission\_summary\_2010-2017.xlsx
  - .\_Manuscript\_MIXv2\_EI\_MLi\_acp\_SI.pdf

The copyright of individual parts of the supplement might differ from the article licence.
